# Supplementary material for: Pan-Genome Analysis of TIFY Gene Family and Functional Analysis of CsTIFY Genes in Cucumber
Source: MDPI journal article supplement (doi:10.3390/ijms25010185), 2023-12-22
Supplement: s1 [file s1]

**Table S5. Primer information used in this study**

| Primers for qRT-PCR (5'-3')      |                       |
|----------------------------------|-----------------------|
| Actin-F                          | GATTCTGGTGATGGTGTGA   |
| Actin-R                          | CGATGAGAGATGGCTGGAATA |
| CsJAZ2-F                         | AAGAGGCAGGATTTGGTA    |
| CsJAZ2-R                         | AGCGACGGTAGGGATGTT    |
| CsJAZ3-F                         | CGGACTCTATTCCACCAG    |
| CsJAZ3-R                         | ACGGCGCAATTCCCTTAC    |
| CsJAZ6-F                         | AATCTGTCATTGGCTCTG    |
| CsJAZ6-R                         | CAAGTGTTGCTGGTGGTC    |
| CsJAZ8-F                         | AGCAGCAACTGAAACCAC    |
| CsJAZ8-R                         | TGAGATCCAGATGCCTTG    |
| CsZML2-F                         | CATTCCGTGGTCAGGTTT    |
| CsZML2-R                         | CTGTCCTTTGTTGCGTTG    |
| CsZML3-F                         | ATCCTCAGATGCGGTTTCG   |
| CsZML3-R                         | CAGCGTAAGTTGGTCAGC    |
| Primers for gene cloning (5'-3') |                       |
| CsZML2-F                         | ATGTACGCACGCGCTC      |
| CsZML2-R                         | AAGCAGCCGTATCA        |
| CsJAZ2-F                         | ATGTCGACTTCTTCCGGA    |
| CsJAZ2-R                         | TTTTTGAGACTGCACCGC    |
| CsJAZ6-F                         | ATGGCTAGGGCAACTG      |
| CsJAZ6-R                         | AGTTAGGTGGGGGCA       |
